# Supplementary material for: A Novel Paper-Based Electrochemical Biosensor Based on N,O-Rich Covalent Organic Frameworks for Carbaryl Detection
Source: MDPI journal article supplement (doi:10.3390/bios12100899), 2022-10-20
Supplement: s1 [file s1]

## Supporting Information

# **A novel paper-based electrochemical biosensor based on N,O-rich covalent organic frameworks for carbaryl detection**

*National Engineering Research Center for Carbohydrate Synthesis/Key Lab of Fluorine and Silicon  
for Energy Materials and Chemistry of Ministry of Education, College of Chemistry and Chemical  
Engineering, Jiangxi Normal University, 99 Ziyang Road, Nanchang 330022, China.*

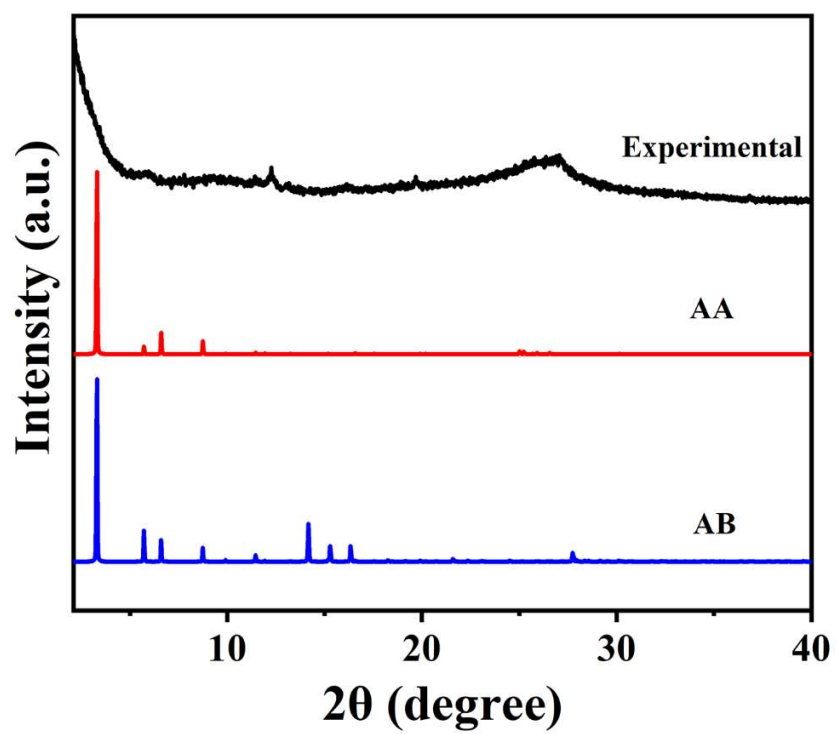

**Figure S1.** Image of experimental and simulated XRD pattern for AA stacking and AB stacking structure of  $\text{COF}_{\text{DHNDA-BTH}}$ .

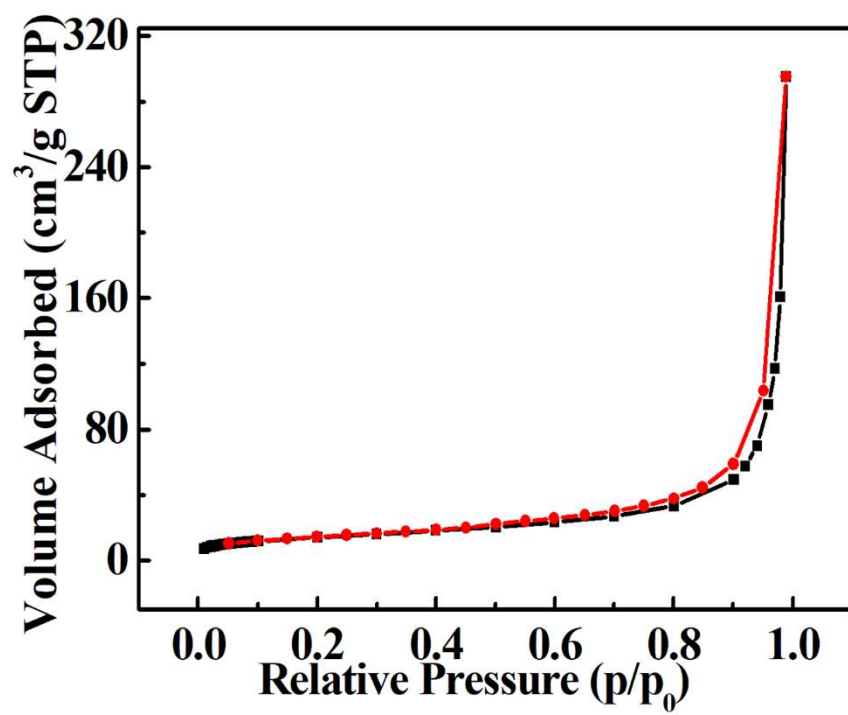

**Figure S2.** Image of pore size distribution of COF<sub>DHNDA-BTH</sub>.

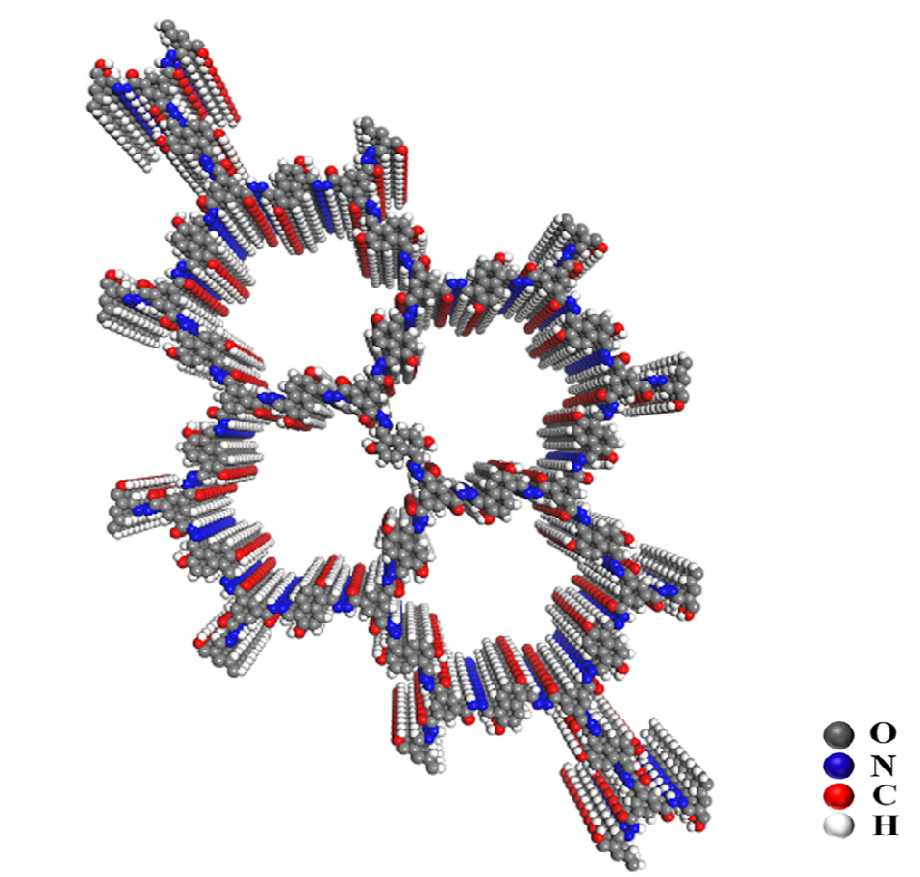

**Figure S3.** Image of  $\pi$ - $\pi$  stacking distance of the layers of COF<sub>DHNDA-BTH</sub>.



**Figure S4.** Image of BET pattern of COF<sub>DHNDA-BTH</sub>.

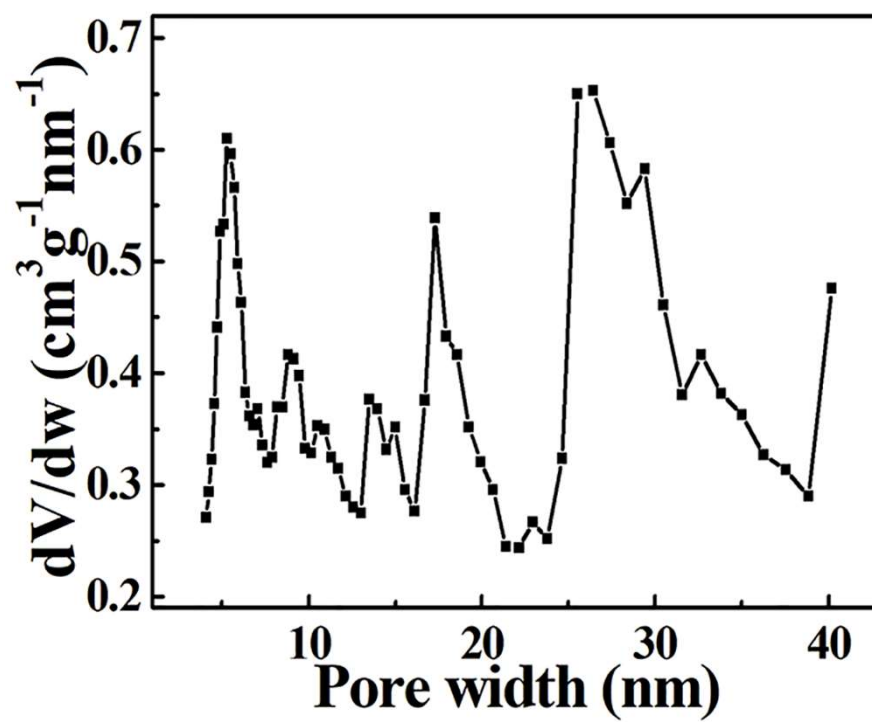

Figure S5. Image of pore size distribution of COF<sub>DHNDA-BTH</sub>.

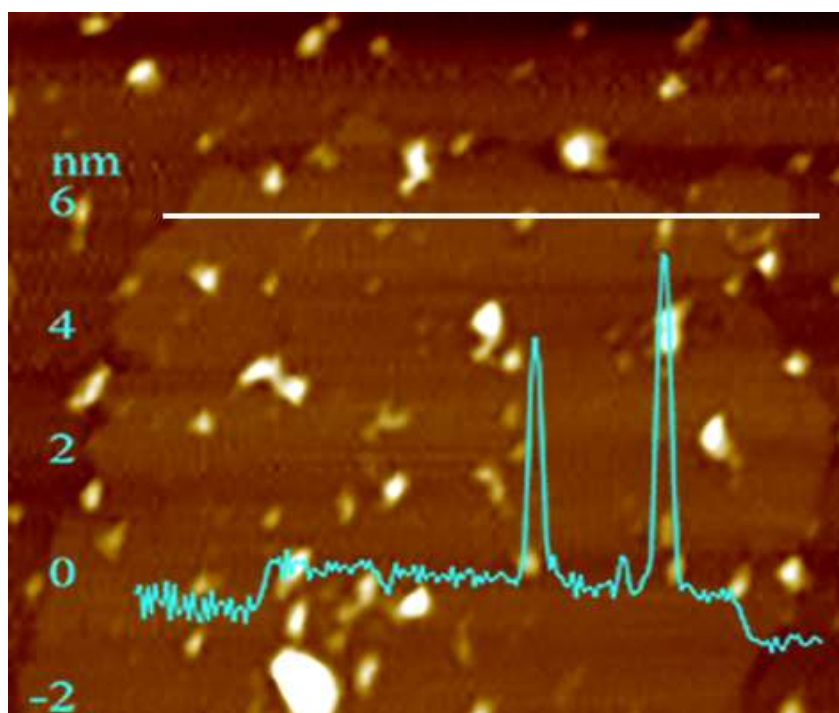

**Figure S6.** Image of AFM of AChE/COF<sub>DHNDA-BTH</sub>.
